# Supplementary material for: Assessment of the Heavy Metals Pollution and Ecological Risk in Sediments of Mediterranean Sea Drain Estuaries in Egypt and Phytoremediation Potential of Two Emergent Plants
Source: MDPI journal article supplement (doi:10.3390/su132112244), 2021-11-05
Supplement: s1 [file s1]

# Assessment of the Heavy Metals Pollution and Ecological Risk in Sediments of Mediterranean Sea Drain Estuaries in Egypt and Phytoremediation Potential of Two Emergent Plants

Yasser A. El-Amier <sup>1,\*</sup>, Armel Zacharie Ekoa Bessa <sup>2</sup>, Ashraf Elsayed <sup>1</sup>, Mohamed A. El-Esawi <sup>3,\*</sup>,  
Mohammad S. AL-Harbi <sup>4</sup>, Bassem N. Samra <sup>4</sup>, and Wafaa K. Kotb <sup>1</sup>

<sup>1</sup> Department of Botany, Faculty of Science, Mansoura University, Mansoura 35516, Egypt; ashraf-badawy@mans.edu.eg (A.E.); w.moataz@gmail.com (W.K.K.)

<sup>2</sup> Department of Earth Sciences, Faculty of Science, University of Yaounde I, Yaoundé, P.O. Box 812, Cameroon; armelekoa@yahoo.fr

<sup>3</sup> Botany Department, Faculty of Science, Tanta University, Tanta 31527, Egypt

<sup>4</sup> Department of Biology, College of Science, Taif University, P.O. Box 11099, Taif 21944, Saudi Arabia; mharbi@tu.edu.sa (M.S.A.-H.), b.elsayed@tu.edu.sa (B.N.S.)

\* Correspondence: yasan@mans.edu.eg (Y.A.E.-A.); mohamed.elesawi@science.tanta.edu.eg (M.A.E.-E.); Tel.: +20-1017229120 (Y.A.E.-A.)

## Supplementary Materials

**Table S1.** Coordinates and characterization of sampling sites along the four drains and Mediterranean Sea coast.

| Sites                                             | Location name    | Longitude (E) | Latitude (N) | Different activities nearby sampling locations from LU/LC analysis                                                           |
|---------------------------------------------------|------------------|---------------|--------------|------------------------------------------------------------------------------------------------------------------------------|
| <i>Drains stream</i>                              |                  |               |              |                                                                                                                              |
| 1                                                 | El- Bustan drain | 31.4536       | 31.7201      | • Wastewater from Kafr Al-Battikh City                                                                                       |
| 2                                                 | El- Bustan drain | 31.4422       | 31.7197      | • Wastewater from the industrial zone in New Damietta city.<br>• Agricultural drainage water (agriculture lands and Orchids) |
| 3                                                 | Gamasa drain     | 31.4389       | 31.5534      | • Wastewater from agricultural lands and villages along the drain                                                            |
| 4                                                 | Gamasa drain     | 31.4157       | 31.5610      |                                                                                                                              |
| 5                                                 | Gamasa drain     | 31.4034       | 31.5119      |                                                                                                                              |
| 6                                                 | Belqas drain     | 31.4839       | 31.4011      | • Agricultural drainage water                                                                                                |
| 7                                                 | Kitchener drain  | 31.5489       | 31.1694      | • Wastewater from agricultural lands and villages along the drain.                                                           |
| 8                                                 | Kitchener drain  | 31.4903       | 31.1502      | • Collect industrial drainage of spinning factories of Kafr El-Sheikh and El-Gharbia Governorates.                           |
| <i>Drains estuary and Mediterranean Sea coast</i> |                  |               |              |                                                                                                                              |
| 9                                                 | Med. coast       | 31.4775       | 31.7331      | • Urban activities                                                                                                           |
| 10                                                | Drain estuary    | 31.4748       | 31.7250      | • Near the border of Damietta Port and New Damietta city.                                                                    |
| 11                                                | Med. coast       | 31.4706       | 31.7106      | • Residential area and El-Bustan drain estuary.                                                                              |
| 12                                                | Med. coast       | 31.4426       | 31.5760      | • Industrial activity is very intense in Gamasa cities and industrial effluents are discharged to Gamasa drain.              |
| 13                                                | Drain estuary    | 31.4454       | 31.5637      |                                                                                                                              |
| 14                                                | Med. coast       | 31.4499       | 31.5329      | • Residential area and Gamasa drain estuary<br>• Near the international coastal road                                         |
| 15                                                | Med. coast       | 31.4913       | 31.4285      | • The process of establishing the New Mansoura City.                                                                         |
| 16                                                | Drain estuary    | 31.4992       | 31.4126      | • Near the international coastal road.                                                                                       |
| 17                                                | Med. coast       | 31.5057       | 31.4020      | • Belqas drain estuary                                                                                                       |
| 18                                                | Med. coast       | 31.5755       | 31.2115      | • Residential area and Kitchener drain estuary.                                                                              |
| 19                                                | Drain estuary    | 31.5822       | 31.1856      | • Near the international coastal road.<br>• Near tourist villages.                                                           |
| 20                                                | Med. coast       | 31.6006       | 31.1047      | • Near the international coastal road.                                                                                       |

**Table 2.** Various pollution indices formulas used in the present study.

| Index                                                                                    | Formula                                                                                        | References                            |
|------------------------------------------------------------------------------------------|------------------------------------------------------------------------------------------------|---------------------------------------|
| <i>Single indices of pollution</i>                                                       |                                                                                                |                                       |
| Enrichment factor (Ef)                                                                   | $EF = \left( \frac{C_{sample}}{Fe_{sample}} \right) / \left( \frac{C_{ref}}{Fe_{ref}} \right)$ | Franco-Uria et al. (2009)             |
| Contamination factor (Cf)                                                                | $CF = C_{sample} / C_{ref}$                                                                    | Hakanson (1980)                       |
| Geoaccumulation index (Igeo)                                                             | $I_{geo} = \text{Log2} \left( \frac{C_{sample}}{1.5Bn} \right)$                                | Muller (1969); Lu and Bai (2010)      |
| Ecological risk factor (Er)                                                              | $Er = Ti * Cf$                                                                                 | Hakanson (1980)                       |
| <i>Total complex indices (include integrated indices and indices of ecological risk)</i> |                                                                                                |                                       |
| Degree of contamination (Dc)                                                             | $Dc = \sum_{i=1}^n CF_i$                                                                       | Hakanson (1980); Caeiro et al. (2005) |
| Potential ecological risk index (PERI)                                                   | $PERI = \sum_{i=1}^n ER$                                                                       | Kowalska et al. (2016)                |

**Abbreviation:**  $C_{sample}$ : metal concentration in soil analyzed sample;  $Fe_{sample}$ : concentration of the reference metal in soil analyzed sample;  $C_{ref}$ : (background) metal concentration in the reference environment;  $Fe_{ref}$  (background), reference metal concentration in the reference environment;  $Bn$ : the geochemical background value in average shale of element  $n$ ; 1.5: the background matrix correction due to terrigenous effects;  $Ti$ : the toxic-response factor for a given substance;  $Cf$ : the contamination factor.

**Table S3.** Classes of used indices for metals in the present study.

| Index | Value                                    | Soil quality                        | Index | Value            | Ecological risk              |
|-------|------------------------------------------|-------------------------------------|-------|------------------|------------------------------|
|       | EF < 2 = natural, EF > 2 = anthropogenic |                                     |       |                  |                              |
| Ef    | Ef < 1                                   | Depletion or no enrichment          | Er    | Er < 40          | Low ecological risk          |
|       | Ef < 2                                   | Minor enrichment                    |       | 40 ≤ Er < 80     | Moderate ecological risk     |
|       | Ef = 2-5                                 | Small enrichment                    |       | 80 ≤ Er < 160    | Considerable ecological risk |
|       | Ef = 5-10                                | Moderately severe enrichment        |       | 160 ≤ Er < 320   | High ecological risk         |
|       | Ef = 10-25                               | Severe enrichment                   |       | Er ≥ 320         | Very high ecological risk    |
|       | Ef = 25-50                               | Very severe enrichment              |       |                  |                              |
|       | Ef > 50                                  | Extremely severe enrichment         |       |                  |                              |
| Cf    | CF < 1                                   | Low contamination factor            | PERI  | PERI < 150       | Low risk                     |
|       | 1 ≤ CF ≤ 3                               | Moderate contamination factor       |       | 150 ≤ PERI < 300 | Moderate                     |
|       | 3 ≤ CF ≤ 6                               | Considerable contamination factor   |       | 300 ≤ PERI < 600 | Considerable                 |
|       | 6 ≤ CF                                   | Very high contamination factor      |       | PERI ≥ 600       | Very high                    |
| Dc    | DC < 8                                   | Low DC                              |       |                  |                              |
|       | 8 ≤ Dc < 16                              | Moderate DC                         |       |                  |                              |
|       | 16 ≤ Dc < 32                             | Considerable DC                     |       |                  |                              |
|       | Dc > 32                                  | Very high                           |       |                  |                              |
| Igeo  | Igeo ≤ 0                                 | Uncontaminated                      |       |                  |                              |
|       | 0 < Igeo < 1                             | Uncontaminated to moderately        |       |                  |                              |
|       | 1 < Igeo < 2                             | contaminated                        |       |                  |                              |
|       | 2 < Igeo < 3                             | Moderately to heavily contaminated  |       |                  |                              |
|       | 3 < Igeo < 4                             | Moderately to strongly contaminated |       |                  |                              |
|       | 4 < Igeo < 5                             | Strongly contaminated               |       |                  |                              |
|       | Igeo > 5                                 | Strongly to extremely contaminated  |       |                  |                              |
|       |                                          | Extremely high contaminated         |       |                  |                              |

Abbreviation: Enrichment factor (EF), Contamination factor (CF), Degree of contamination (Dc), Geoaccumulation index (Igeo), Ecological risk factor (Er) and Potential ecological risk index (PERI).

**Table S4.** Various indicators used in the present study to assess the potential of the two macrophytes species for phytoremediation.

| Index                        | Formula                        | References                           |
|------------------------------|--------------------------------|--------------------------------------|
| Bioaccumulation factor (BAF) | $BAF = \frac{C_r}{C_{sample}}$ | Baker (1981); Ghosh and Singh (2005) |
| Enrichment factor (EF)       | $EF = \frac{C_s}{C_{sample}}$  |                                      |
| Translocation Factor (TF)    | $EF = \frac{C_s}{C_r}$         |                                      |

**Abbreviation:** *C<sub>sample</sub>*: metal concentration in sediment analyzed sample; *C<sub>r</sub>*: metal's concentration in roots of the studied macrophytes species; *C<sub>s</sub>*: metal's concentration in shoots of the studied macrophytes species.

**Table S5.** Microelement concentrations (mg kg<sup>-1</sup>) in roots and shoots of three studied emergent hydrophytes naturally growing along studied drains.

| Plant species                 | Plant part | Drain           | Metals               |                     |                                 |                    |                    |                    |                    |                    |                                 |
|-------------------------------|------------|-----------------|----------------------|---------------------|---------------------------------|--------------------|--------------------|--------------------|--------------------|--------------------|---------------------------------|
|                               |            |                 | Fe                   | Mn                  | Zn                              | Cu                 | Cr                 | Co                 | Cd                 | Ni                 | Pb                              |
| <i>Cyperus alopecuroides</i>  | Root       | El-Bustan (n=2) | 1072.80              | 651.12              | 64.22                           | 64.12              | 23.87              | 18.97              | 28.52              | 60.40              | 13.57                           |
|                               |            | Gamasa (n=3)    | 1807.50              | 785.82              | 98.93                           | 98.82              | 58.57              | 53.67              | 63.22              | 95.11              | 44.61                           |
|                               |            | Belqas (n=1)    | 978.11               | 256.43              | 29.53                           | 32.43              | 19.18              | 14.28              | 21.83              | 45.71              | 9.21                            |
|                               |            | Kitchener (n=2) | 1186.14              | 764.46              | 77.56                           | 77.45              | 37.21              | 32.31              | 41.86              | 73.74              | 23.24                           |
|                               |            | Mean            | 1261.14 <sub>A</sub> | 614.46 <sub>A</sub> | 67.56 <sup>A</sup>              | 68.20 <sup>A</sup> | 34.71 <sup>A</sup> | 29.81 <sup>A</sup> | 38.86 <sup>A</sup> | 68.74 <sup>A</sup> | 22.66 <sup>A</sup>              |
|                               |            | ±SE             | 93.51                | 61.47               | 7.28                            | 6.95               | 4.41               | 4.41               | 4.56               | 5.24               | 3.94                            |
|                               | Shoot      | El-Bustan (n=2) | 750.30               | 95.62               | 34.15                           | 7.32               | 3.09               | 3.12               | 3.61               | 2.35               | 2.81                            |
|                               |            | Gamasa (n=3)    | 951.96               | 430.28              | 17.39                           | 3.94               | 2.40               | 0.48               | 4.33               | 3.15               | 1.93                            |
|                               |            | Belqas (n=1)    | 345.17               | 124.49              | 35.87                           | 12.30              | 4.25               | 4.58               | 11.35              | 2.87               | 6.48                            |
|                               |            | Kitchener (n=2) | 853.76               | 432.08              | 19.19                           | 5.74               | 2.62               | 2.28               | 5.36               | 2.11               | 2.13                            |
|                               |            | Mean            | 725.30 <sup>B</sup>  | 270.62 <sub>B</sub> | 26.65 <sup>A</sup>              | 7.32 <sup>B</sup>  | 3.09 <sup>B</sup>  | 2.62 <sup>B</sup>  | 6.16 <sup>B</sup>  | 2.62 <sup>A</sup>  | 3.34 <sup>AB</sup>              |
|                               |            | ±SE             | 66.61                | 46.44               | 2.43                            | 0.90               | 0.21               | 0.43               | 0.88               | 0.12               | 0.53                            |
| <i>Persicaria salicifolia</i> | Root       | El-Bustan (n=2) | 582.66               | 383.23              | 47.03                           | 13.87              | 6.44               | 1.54               | 8.75               | 57.64              | 16.32                           |
|                               |            | Gamasa (n=3)    | 606.29               | 406.87              | 70.67                           | 26.44              | 26.37              | 19.07              | 32.39              | 81.27              | 39.96                           |
|                               |            | Belqas (n=1)    | 591.78               | 392.35              | 56.15                           | 15.92              | 15.56              | 9.66               | 17.87              | 66.76              | 25.44                           |
|                               |            | Kitchener (n=2) | 593.57               | 294.15              | 57.95                           | 17.72              | 17.36              | 11.46              | 19.67              | 68.56              | 27.24                           |
|                               |            | Mean            | 593.57 <sup>B</sup>  | 369.15 <sub>B</sub> | 57.95 <sup>A</sup> <sub>B</sub> | 18.49 <sup>B</sup> | 16.43 <sup>B</sup> | 10.43 <sup>B</sup> | 19.67 <sup>B</sup> | 68.56 <sup>B</sup> | 27.24 <sup>B</sup> <sub>C</sub> |
|                               |            | ±SE             | 2.43                 | 12.73               | 2.43                            | 1.38               | 2.04               | 1.80               | 2.43               | 2.43               | 2.43                            |
|                               | Shoot      | El-Bustan (n=2) | 496.73               | 170.42              | 32.73                           | 2.90               | 5.29               | 1.19               | 7.16               | 41.01              | 8.32                            |
|                               |            | Gamasa (n=3)    | 556.17               | 273.49              | 37.45                           | 7.61               | 10.01              | 1.29               | 11.88              | 45.73              | 13.03                           |
|                               |            | Belqas (n=1)    | 292.41               | 151.73              | 69.11                           | 8.49               | 1.90               | 6.16               | 18.90              | 14.54              | 12.63                           |
|                               |            | Kitchener (n=2) | 489.42               | 162.99              | 23.09                           | 5.42               | 9.91               | 5.10               | 10.92              | 26.41              | 5.69                            |
|                               |            | Mean            | 458.68 <sup>B</sup>  | 189.65 <sub>B</sub> | 40.59 <sup>B</sup>              | 6.10 <sup>B</sup>  | 6.78 <sup>B</sup>  | 3.43 <sup>B</sup>  | 12.22 <sup>B</sup> | 31.92 <sup>C</sup> | 9.92 <sup>C</sup>               |
|                               |            | ±SE             | 28.70                | 14.10               | 4.98                            | 0.62               | 0.98               | 0.64               | 1.22               | 3.55               | 0.88                            |
| <i>P-value</i>                |            |                 | 0.0002*              | 0.0139              | 0.0431                          | 0.0001*            | 0.0032             | 0.0060             | 0.0058             | 0.000*             | 0.013                           |
|                               |            |                 | **                   | *                   | *                               | **                 | **                 | **                 | **                 | **                 | 5*                              |

Different superscript letters within each element and factor mean values significance. Significance level fixed at *p*-values < 0.05. \*\*\*: significant at *p*≤0.001, \*\*: significant at *p*≤0.01, \*: significant at *p*≤0.05.
